# Supplementary material
Source: PubMed Central journal article supplement (PMC8243898)
Supplement: NIHMS1680167-supplement-ST1.pdf [file NIHMS1680167-supplement-ST1.pdf]

**Supplemental Table 1.** Liquid Chromatography Gradient Conditions.

| <b>Time (min)</b> | <b>Flow Rate<br/>(<math>\mu</math>L/min)</b> | <b>% Solvent A</b> | <b>% Solvent B</b> |
|-------------------|----------------------------------------------|--------------------|--------------------|
| 0                 | 3                                            | 95                 | 5                  |
| 1                 | 3                                            | 90                 | 10                 |
| 4.5               | 3                                            | 75                 | 25                 |
| 5                 | 3                                            | 15                 | 85                 |
| 6.5               | 3                                            | 15                 | 85                 |
| 8.5               | 3                                            | 95                 | 5                  |
| 10                | 3                                            | 95                 | 5                  |

Solvent A: Water with 0.1% Formic Acid

Solvent B: Acetonitrile with 0.1% Formic Acid
