# Supplementary material
Source: PubMed Central journal article supplement (PMC8243898)
Supplement: NIHMS1680167-supplement-ST2.pdf [file NIHMS1680167-supplement-ST2.pdf]

**Supplemental Table 2.** Peptide Characteristics and Mass Spectrometry Settings.

| Peptide         | Sequence                | Mass (Da) | Precursor ion (m/z) | Product ion (m/z) | Cone Voltage (V) | Collision Energy (eV) |
|-----------------|-------------------------|-----------|---------------------|-------------------|------------------|-----------------------|
| ATP7B 887- 901  | ATHVGNDTTLAQIVK         | 1567.76   | 523.29 +++          | [y7+] -772.49     | 0                | 14                    |
|                 |                         |           |                     | [y6+] -671.45     | 6                | 14                    |
|                 |                         |           |                     | [y5+] -558.36     | 2                | 16                    |
|                 |                         |           |                     | [b3+] -310.15     | 2                | 24                    |
| ATP7B 1056-1077 | VLAVVGTAEEASSEHPLGVAVTK | 2135.45   | 712.40 +++          | [y20++] -962.01   | 0                | 18                    |
|                 |                         |           |                     | [y18++] -876.96   | 4                | 21                    |
|                 |                         |           |                     | [y17++] -827.43   | 2                | 19                    |
|                 |                         |           |                     | [b3+] -284.20     | 0                | 21                    |
