# Supplementary material
Source: PubMed Central journal article supplement (PMC8243898)
Supplement: NIHMS1680167-supplement-ST3.pdf [file NIHMS1680167-supplement-ST3.pdf]

Supplemental Table 3. The List of 216 Wilson Disease Patients

| Patient | Gender | Age | Variant1      | Variant2                                        | Zygoty       | [ATP7B 1056]<br>pmol/L | [ATP7B 887]<br>pmol/L | CPL<br>(mg/dl) | Liver Copper (ug/g<br>of tissue) | Leipzig Score | KF Ring | Presentation | [ADA 93]<br>pmol/L | [CD42 128]<br>pmol/L | [IDUA 462]<br>pmol/L |
|---------|--------|-----|---------------|-------------------------------------------------|--------------|------------------------|-----------------------|----------------|----------------------------------|---------------|---------|--------------|--------------------|----------------------|----------------------|
| 1       | M      | NA  | p.A874V       | p.A874V                                         | Homo         | 145                    | 9.1                   | 4              | -                                | 8             | Y       | B*           | 2465.3             | 5532.0               | 53.7                 |
| 2       | F      | 9   | p.G1089E      | p.G1089E                                        | Homo         | ND                     | ND                    | 2              | -                                | 8             | Y       | H*           | 2317.7             | 6899.4               | 28.0                 |
| 3       | M      | 18  | p.G1335E      | p.G1335E                                        | Homo         | ND                     | ND                    | <2             | -                                | 6             | Y       | N            | 1536.3             | 3763.4               | 22.7                 |
| 4       | M      | 12  | p.G1341D      | p.G1341D                                        | Homo         | ND                     | ND                    | 2              | -                                | 6             | N       | H            | 2080.0             | 17457.1              | 22.4                 |
| 5       | M      | 14  | p.G1341D      | p.G1341D                                        | Homo         | ND                     | ND                    | -              | -                                | 4             | N       | H            | 2910.3             | 18932.6              | 31.7                 |
| 6       | M      | 18  | p.G1341D      | p.G1341D                                        | Homo         | ND                     | ND                    | -              | -                                | 4             | N       | H            | 5750.0             | 18816.0              | 13.8                 |
| 7       | M      | 7   | p.G1341D      | p.G1341D                                        | Homo         | ND                     | ND                    | -              | -                                | 4             | N       | H            | 3513.7             | 8901.7               | 15.1                 |
| 8       | M      | 17  | p.G1341D      | p.G1341D                                        | Homo         | ND                     | ND                    | 13             | -                                | 6             | N       | H            | 3098.0             | 6265.3               | 18.8                 |
| 9       | F      | 15  | p.G1341E      | p.G1341E                                        | Homo         | 2.2                    | ND                    | 1.4            | -                                | 6             | N       | H            | 2652.9             | 17779.4              | 43.2                 |
| 10      | M      | 34  | p.G710S       | p.G710S                                         | Homo         | 120.4                  | 155.3                 | <9             | -                                | 8             | Y       | N            | 2549.7             | 7705.1               | 42.2                 |
| 11      | M      | 17  | p.G710S       | p.G710S                                         | Homo         | 193.2                  | 264.3                 | 12             | -                                | 10            | Y       | B*           | 2136.3             | 9068.6               | 22.4                 |
| 12      | F      | 44* | p.G710S       | p.G710S                                         | Homo         | 151.1                  | 193.6                 | 9.1            | 164                              | 11            | Y       | N            | 1872.3             | 12139.4              | 20.8                 |
| 13      | M      | 19  | p.G710S       | p.G710S                                         | Homo         | 252.4                  | 381.7                 | 20.7           | 1243                             | 8             | Y       | B            | 2324.9             | 19051.4              | 47.1                 |
| 14      | M      | 6   | p.H1069Q      | p.H1069Q                                        | Homo         | ND                     | 17.2                  | 17             | -                                | 5             | N       | H            | 3844.3             | 25490.3              | 28.1                 |
| 15      | M      | NA  | p.H1069Q      | p.H1069Q                                        | Homo         | ND                     | 23.9                  | 6.6            | -                                | 10            | Y       | B            | 1774.6             | 11341.7              | 26.7                 |
| 16      | M      | NA  | p.H1069Q      | p.H1069Q                                        | Homo         | ND                     | 19.3                  | NA             | -                                | 4             | -       | -            | 2088.0             | 12480.0              | 25.6                 |
| 17      | F      | 35  | p.H1069Q      | p.H1069Q                                        | Homo         | ND                     | 42.8                  | 15             | -                                | 9             | Y       | B*           | 2469.4             | 9768.0               | 35.7                 |
| 18      | F      | NA  | p.H1069Q      | p.H1069Q                                        | Homo         | ND                     | 20.1                  | NA             | -                                | 4             | N       | H            | 5365.1             | 21436.6              | 44.9                 |
| 19      | F      | 11  | p.H1069Q      | p.H1069Q                                        | Homo         | ND                     | 21.9                  | 22             | -                                | 4             | N       | H            | 3122.6             | 20465.1              | 50.9                 |
| 20      | F      | 20  | p.H1069Q      | p.H1069Q                                        | Homo         | ND                     | 25.6                  | 5.5            | -                                | 6             | N       | H*           | 3023.1             | 9196.6               | 19.7                 |
| 21      | M      | 61  | p.H1069Q      | p.H1069Q                                        | Homo         | ND                     | 18.8                  | 17             | -                                | 2             | -       | B            | 4093.1             | 11008.0              | 52.8                 |
| 22      | F      | 43  | p.H1069Q      | p.H1069Q                                        | Homo         | ND                     | 16.8                  | 20             | -                                | 5             | N       | H            | 2180.9             | 9100.6               | 65.0                 |
| 23      | F      | 49  | p.H1069Q      | p.H1069Q                                        | Homo         | ND                     | 10.0                  | 7              | -                                | 10            | Y       | H            | 794.9              | 4219.4               | 14.1                 |
| 24      | M      | 15  | p.H1069Q      | p.H1069Q                                        | Homo         | ND                     | 11.1                  | <4             | -                                | 10            | Y       | H            | 1301.4             | 7500.6               | 28.4                 |
| 25      | F      | 11  | p.H1069Q      | p.H1069Q                                        | Homo         | ND                     | 8.5                   | 20             | -                                | 5             | N       | H            | 619.1              | 2969.1               | 11.5                 |
| 26      | F      | 25  | p.H1069Q      | p.H1069Q                                        | Homo         | ND                     | 23.6                  | 10             | -                                | 10            | Y       | B            | 3150.3             | 15918.9              | 48.3                 |
| 27      | F      | 27  | p.H1069Q      | p.H1069Q                                        | Homo         | ND                     | 33.4                  | 14             | -                                | 7             | Y       | H            | 9474.3             | 9320.0               | 54.4                 |
| 28      | M      | 26  | p.H1069Q      | p.H1069Q                                        | Homo         | ND                     | 26.6                  | 13.4           | -                                | 5             | N       | H            | 3606.9             | 7052.6               | 29.0                 |
| 29      | F      | 28  | p.H1069Q      | p.H1069Q                                        | Homo         | ND                     | 20.0                  | 26             | -                                | 6             | N       | H            | NA                 | NA                   | NA                   |
| 30      | M      | 15  | p.H1069Q      | p.H1069Q                                        | Homo         | ND                     | 27.3                  | 14.6           | 1288.0                           | 7             | N       | H            | 3732.0             | 13993.1              | 51.7                 |
| 31      | F      | 13  | p.H1069Q      | p.H1069Q                                        | Homo         | ND                     | 21.4                  | 13.1           | -                                | 5             | N       | H            | 3143.7             | 4384.0               | 18.7                 |
| 32      | M      | NA  | p.H1069Q      | p.H1069Q                                        | Homo         | ND                     | 27.6                  | 21             | 1000                             | 11            | Y       | B*           | 2425.4             | 12293.7              | 46.6                 |
| 33      | M      | NA  | p.H1069Q      | p.H1069Q                                        | Homo         | ND                     | 11.5                  | 10             | -                                | 10            | Y       | B*           | 2986.0             | 4201.1               | 18.6                 |
| 34      | M      | NA  | p.H1069Q      | p.H1069Q                                        | Homo         | ND                     | 15.9                  | 20             | 500                              | 6             | Y       | H*           | 4577.4             | 12419.4              | 35.4                 |
| 35      | F      | NA  | p.H1069Q      | p.H1069Q                                        | Homo         | ND                     | 7.5                   | 8              | 944                              | 11            | Y       | N            | 3210.9             | 7339.4               | 29.0                 |
| 36      | M      | 19  | p.H1069Q      | p.H1069Q                                        | Homo         | ND                     | 34.9                  | <10            | -                                | 10            | Y       | B            | 2858.3             | 11086.9              | 31.8                 |
| 37      | F      | 29  | p.H1069Q      | p.H1069Q                                        | Homo         | ND                     | 30.3                  | 13             | 547                              | 9             | Y       | H            | 4119.7             | 9336.0               | 50.7                 |
| 38      | M      | 0   | p.H1069Q      | p.H1069Q                                        | Homo         | ND                     | 5.1                   | 20             | -                                | 4             | N       | H            | 3078.3             | 20000.0              | 39.0                 |
| 39      | F      | 22  | p.H1069Q      | p.H1069Q                                        | Homo         | ND                     | 7.5                   | 24             | 1415                             | 6             | N       | H            | 2578.0             | 8898.3               | 17.9                 |
| 40      | M      | 37  | p.H1069Q      | p.H1069Q                                        | Homo         | ND                     | 9.4                   | 9.3            | 247                              | 6             | N       | H            | 1260.6             | 5152.0               | 17.4                 |
| 41      | M      | 16  | p.H1069Q      | p.H1069Q                                        | Homo         | ND                     | 8.8                   | 12.8           | -                                | 6             | N       | H            | 949.1              | 7381.7               | 21.9                 |
| 42      | M      | 48  | p.H1069Q      | p.H1069Q                                        | Homo         | ND                     | 13.1                  | 16             | 915                              | 5             | N       | H            | 839.1              | 8204.6               | 19.2                 |
| 43      | F      | 44  | p.R778L       | p.R778L                                         | Homo         | 2.2                    | <3.0                  | 10             | -                                | 10            | Y       | H            | 2551.4             | 5265.6               | 26.5                 |
| 44      | F      | 7   | p.R816S       | p.R816S                                         | Homo         | ND                     | ND                    | 3.9            | 500                              | 8             | N       | H            | 1895.4             | 11811.4              | 48.5                 |
| 45      | F      | 13  | p.V845S-fs    | p.V845S-fs                                      | Homo         | ND                     | ND                    | 4              | -                                | 6             | N       | H            | 865.1              | 10420.6              | 20.1                 |
| 46      | F      | NA  | p.W779X       | p.W779X                                         | Homo         | ND                     | ND                    | 2              | -                                | 11            | Y       | H            | 8270.6             | 6845.7               | 36.3                 |
| 47      | M      | 5   | p.W939C       | p.W939C                                         | Homo         | ND                     | ND                    | 3              | -                                | 6             | N       | H            | 2933.1             | 14877.7              | 33.2                 |
| 48      | M      | 9   | p.W939C       | p.W939C                                         | Homo         | ND                     | ND                    | -              | -                                | 4             | N       | H            | 2737.4             | 13273.1              | 28.9                 |
| 49      | F      | 18  | p.W939C       | p.W939C                                         | Homo         | 13.3                   | 31.3                  | -              | -                                | 4             | N       | H            | 920.6              | 5564.6               | 77.2                 |
| 50      | F      | 12  | p.H1069Q      | p.H1069Q                                        | Homo         | ND                     | ND                    | -              | -                                | 6             | N       | H            | 1497.7             | 9368.0               | 31.9                 |
| 51      | F      | 13  | p.H1069Q      | p.H1069Q                                        | Homo         | ND                     | 56.1                  | 12             | -                                | 7             | N       | H*           | 4446.3             | 27376.0              | 36.0                 |
| 52      | M      | 12  | p.H1069Q      | p.H1069Q                                        | Comp. Hetero | ND                     | 11.8                  | <9             | 164                              | 7             | N       | H*           | 2021.4             | 9506.3               | 35.4                 |
| 53      | M      | 13  | p.G1089E      | p.N1270S                                        | Comp. Hetero | 41.7                   | 48.8                  | <2             | -                                | 6             | N       | H            | 3156.9             | 6960.0               | 14.5                 |
| 54      | M      | 8   | p.H1069Q      | 2304dupC                                        | Comp. Hetero | ND                     | 14.1                  | 5              | 547                              | 9             | N       | N            | 2651.4             | 6113.1               | 40.6                 |
| 55      | M      | 59  | p.H1069Q      | arr[GRCh37]<br>13q14.3(52541594_5<br>2548863)x1 | Comp. Hetero | ND                     | 16.1                  | 13             | -                                | 5             | Y       | H            | 3754.0             | 9434.3               | 57.2                 |
| 56      | M      | 20  | p.R778L       | c.1543 +1G>T                                    | Comp. Hetero | ND                     | ND                    | <3.0           | -                                | 8             | N       | H            | 3748.9             | 6905.1               | 41.4                 |
| 57      | F      | 15  | p.M769H-fs*38 | c.1576G>A                                       | Comp. Hetero | ND                     | ND                    | >10            | -                                | 8             | Y       | H*           | 3076.9             | 11376.4              | 38.3                 |
| 58      | F      | 12  | p.G710S       | c.1708-1G>C                                     | Comp. Hetero | 69.5                   | 109.6                 | 27             | -                                | 8             | N       | H            | 2145.7             | 5556.0               | 34.3                 |
| 59      | F      | 10  | p.V845S-fs    | c.1708-1g>c                                     | Comp. Hetero | 17.3                   | 42.6                  | 11             | -                                | 5             | N       | H            | 3586.3             | 7797.7               | 16.9                 |
| 60      | M      | 63  | p.S657R       | c.2122-8T>C                                     | Comp. Hetero | 8.7                    | 6.4                   | 5              | -                                | 6             | Y       | H            | 1387.1             | 5377.1               | 31.8                 |
| 61      | F      | 18  | p.C268L-fs    | c.2304dupC                                      | Comp. Hetero | ND                     | ND                    | 3              | -                                | 9             | Y       | N            | 5830.0             | 9896.0               | 27.0                 |
| 62      | M      | 10  | p.H1069Q      | c.2304dupC                                      | Comp. Hetero | ND                     | 18.5                  | 1              | -                                | -             | N       | H            | 3208.0             | 21105.1              | 41.6                 |
| 63      | F      | 19  | p.H1069Q      | c.2304dupC                                      | Comp. Hetero | ND                     | 11.6                  | 16.9           | -                                | 7             | Y       | H            | 1937.1             | 6809.1               | 41.2                 |
| 64      | M      | 20  | p.H628R-fs    | c.2304dupC                                      | Comp. Hetero | ND                     | ND                    | 2              | -                                | 10            | Y       | N            | 2886.9             | 12016.0              | 21.5                 |
| 65      | F      | 14  | p.H1069Q      | c.2865+1g>a                                     | Comp. Hetero | ND                     | 7.7                   | 6              | -                                | 10            | Y       | N            | 2690.3             | 17574.9              | 35.3                 |
| 66      | F      | 9   | p.H1069Q      | c.2865+1g>a                                     | Comp. Hetero | ND                     | 6.5                   | 6.6            | -                                | 6             | N       | H            | 2452.0             | 6259.4               | 15.5                 |
| 67      | F      | 17  | p.Ser135*     | c.2865+1G>A                                     | Comp. Hetero | ND                     | ND                    | <135           | -                                | 9             | N       | H            | 2188.6             | 7273.1               | 59.6                 |
| 68      | M      | 11  | c.1708-1g>c   | c.2866-3c>g                                     | Comp. Hetero | 22.4                   | 37.7                  | -              | -                                | 6             | Y       | H            | 1973.1             | 14261.7              | 33.9                 |
| 69      | F      | 16  | p.I102H       | c.3060+5G>C                                     | Comp. Hetero | 2.8                    | ND                    | <3.0           | -                                | 8             | Y       | H            | 3197.1             | 8881.1               | 25.1                 |
| 70      | M      | NA  | p.H1069Q      | c.3242A>G                                       | Comp. Hetero | ND                     | 11.8                  | 13.5           | 500                              | 9             | N       | H*           | 1200.3             | 12093.9              | 42.1                 |
| 71      | M      | 8   | p.M769H-fs*26 | c.3244-2A>G                                     | Comp. Hetero | ND                     | ND                    | <2             | 1412                             | 7             | N       | H            | 3143.1             | 15660.6              | 29.9                 |
| 72      | F      | 24  | p.G710S       | c.3400delC                                      | Comp. Hetero | 57.7                   | 96.6                  | 0.6            | 448                              | 12            | Y       | B            | 3192.0             | 6572.6               | 37.8                 |
| 73      | M      | NA  | p.H1069Q      | c.IV512+1g>a                                    | Comp. Hetero | 15.7                   | 26.1                  | 13             | 1112                             | 9             | Y       | H            | 3530.3             | 9834.3               | 30.9                 |
| 74      | F      | 12  | p.H1069Q      | IVS19-1C>G                                      | Comp. Hetero | ND                     | 13.5                  | 3              | -                                | 9             | Y       | N            | 2202.3             | 6286.9               | 19.0                 |
| 75      | F      | 18  | p.W779X       | p.A1003T                                        | Comp. Hetero | ND                     | 5.8                   | 7.2            | 765                              | 10            | Y       | H*           | 2124.3             | 6218.3               | 34.7                 |
| 76      | M      | 5   | p.E458X       | p.A1018V                                        | Comp. Hetero | 26.4                   | 47.5                  | 4.1            | 793                              | 8             | N       | H            | 4988.6             | 17910.9              | 34.1                 |
| 77      | F      | 14  | p.W779X       | p.A1018V                                        | Comp. Hetero | ND                     | ND                    | >10            | -                                | 8             | Y       | H*           | 2277.7             | 6711.1               | 33.4                 |
| 78      | F      | 22  | p.H1069Q      | p.A1135C-fs*13                                  | Comp. Hetero | ND                     | 7.9                   | 12             | -                                | 5             | N       | H            | 2168.9             | 11422.1              | 31.1                 |
| 79      | M      | 59  | p.L1088X      | p.A1135C-fs*13                                  | Comp. Hetero | ND                     | ND                    | <4             | -                                | 6             | Y       | H            | 3810.9             | 11644.6              | 24.3                 |
| 80      | M      | 40  | p.C2299insC   | p.A874V                                         | Comp. Hetero | 6.0                    | 10.5                  | 5.5            | 1575                             | 10            | Y       | H*           | 2610.3             | 12792.0              | 29.9                 |
| 81      | F      | 36  | p.H1069Q      | p.A874V                                         | Comp. Hetero | 6.8                    | 25.9                  | NA             | -                                | 4             | N       | H*           | 3202.0             | 12013.7              | 35.4                 |
| 82      | F      | 38  | p.H1069Q      | p.A874V                                         | Comp. Hetero | 17.0                   | 27.6                  | <10            | -                                | 8             | Y       | H*           | 2884.0             | 8362.3               | 24.0                 |
| 83      | F      | 39  | p.R778L       | p.A874V                                         | Comp. Hetero | 4.4                    | 9.2                   | <3.0           | -                                | 8             | Y       | B            | 9270.9             | 3377.1               | 9.1                  |
| 84      | M      | 13  | p.H1336V      | p.C709T                                         | Comp. Hetero | ND                     | 10.5                  | 13             | 552                              | 8             | N       | H            | 4010.6             | 11921.1              | 34.6                 |
| 85      | F      | NA  | p.I1336V      | p.C709T                                         | Comp. Hetero | ND                     | 6.3                   | 3              | -                                | 7             | N       | H            | 4288.3             | 20630.4              | 33.9                 |
| 86      | F      | 68  | p.E332K       | p.D1047V                                        | Comp. Hetero | 51.7                   | 79.3                  | 27             | 26                               | 6             | N       | B            | 2820.9             | 17629.7              | 55.2                 |
| 87      | F      | 19  | p.H1069Q      | p.D1447G-fs                                     | Comp. Hetero | 67.5                   | 130.7                 | 13             | -                                | 6             | N       | H            | 2052.0             | 7753.1               | 60.3                 |
| 88      | F      | 8   | p.M769H-fs    | p.D1460Y                                        | Comp. Hetero | 20.3                   | 39.3                  | low            | -                                | 6             | N       | H            | 2135.1             | 15747.4              | 51.4                 |
| 89      | F      | 35  | c.1707+2dupT  | p.D642H                                         | Comp. Hetero | 5.4                    | ND                    | 5              | -                                | 6             | N       | H            | 734.9              | 9130.3               | 20.5                 |
| 90      | F      | 23  | p.R827P       | p.D853G                                         | Comp. Hetero | 88.9                   | 93.9                  | 21             | -                                | 4             | N       | H*           | 2782.0             | 8982.9               | 11.4                 |
| 91      | F      | 26  | p.H1069Q      | p.D918N                                         | Comp. Hetero | 54.8                   | 65.1                  | 13             | 1692                             | 9             | Y       | H            | 4010.6             | 11921.1              | 34.6                 |
| 92      | F      | 51  | p.H1069Q      | p.E1064A                                        | Comp. Hetero | ND                     | 23.7                  | 14.2           | 1025                             | 9             | N       | H            | 1646.0             | 12393.4              | 28.5                 |
| 93      | F      | 20  | p.H1069Q      | p.E1064K                                        | Comp. Hetero | ND                     | ND                    | 9.4            | 193                              | 7             | N       | H*           | 352                |                      |                      |

|     |   |          |                  |               |              |       |       |      |      |    |   |    |        |         |      |
|-----|---|----------|------------------|---------------|--------------|-------|-------|------|------|----|---|----|--------|---------|------|
| 123 | F | 24       | p.Q447L-fs       | p.H1069Q      | Comp. Hetero | ND    | 9.3   | 7    | -    | 10 | Y | B* | 2853.7 | 9617.1  | 36.7 |
| 124 | M | 17       | p.Q70-fs*14      | p.H1069Q      | Comp. Hetero | 135.8 | 242.5 | 19   | -    | 5  | N | H  | 1846.9 | 20980.6 | 29.1 |
| 125 | M | 9        | p.Q70-fs*14      | p.H1069Q      | Comp. Hetero | 79.4  | 176.3 | 16   | -    | 5  | N | H  | 1495.4 | 25612.6 | 57.7 |
| 126 | M | 73       | p.R919W          | p.H1069Q      | Comp. Hetero | ND    | ND    | 20   | 1191 | 4  | Y | N  | 1346.3 | 10641.1 | 62.6 |
| 127 | M | 32       | p.R969Q          | p.H1069Q      | Comp. Hetero | 88.2  | 102.6 | -    | -    | 4  | N | B  | 4115.1 | 12371.4 | 27.2 |
| 128 | F | 71       | p.S657R          | p.H1069Q      | Comp. Hetero | 6.9   | 20.9  | 11   | -    | 5  | Y | N  | 1794.3 | 13658.3 | 49.2 |
| 129 | F | 16       | p.V1765-fs*28    | p.H1069Q      | Comp. Hetero | ND    | 3.9   | 10   | >250 | 6  | N | H  | 730.86 | 8594.3  | 32.8 |
| 130 | M | 20       | p.T59H-fs*19     | p.H1247Q      | Comp. Hetero | 23.6  | 27.2  | <4   | 54   | 9  | Y | N  | 1348.0 | 8240.0  | 43.2 |
| 131 | F | 13       | p.H1069Q         | p.I1007T-fs   | Comp. Hetero | ND    | 5.4   | 14   | -    | 5  | Y | H  | 2344.6 | 11632.0 | 49.1 |
| 132 | M | 32       | p.R778L          | p.I582R-fs*25 | Comp. Hetero | ND    | ND    | <3.0 | -    | 8  | N | H  | 4712.6 | 6894.9  | 37.2 |
| 133 | M | 18       | p.H1069Q         | p.K1028S-fs   | Comp. Hetero | ND    | 3.9   | 12   | 842  | 7  | N | H* | 1874.6 | 2573.7  | 8.7  |
| 134 | F | 10       | p.M769H-fs       | p.K1028S-fs   | Comp. Hetero | ND    | 6.3   | 4    | -    | 10 | Y | N  | 4226.0 | 15436.6 | 45.7 |
| 135 | M | 15       | p.R778L          | p.K838S-fs*35 | Comp. Hetero | ND    | ND    | <3.0 | -    | 8  | Y | H  | 2789.4 | 7065.1  | 16.4 |
| 136 | M | 22       | p.R778L          | p.K838S-fs*35 | Comp. Hetero | ND    | ND    | <3.0 | -    | 10 | Y | N  | 3576.6 | 3433.1  | 24.5 |
| 137 | F | 13       | p.W939C          | p.L1057P      | Comp. Hetero | ND    | ND    | -    | -    | 8  | Y | H  | 5412.3 | 5134.9  | 10.6 |
| 138 | M | 6        | p.H1069Q         | p.L1305P      | Comp. Hetero | ND    | 26.5  | -    | 1163 | 6  | N | H  | 4234.6 | 6404.6  | 50.0 |
| 139 | M | 6        | p.H1069Q         | p.L1305P      | Comp. Hetero | ND    | 4.3   | 14   | 613  | 7  | N | H  | 2027.1 | 9700.6  | 39.5 |
| 140 | F | 29       | p.R616Q          | p.L1305P      | Comp. Hetero | 105.5 | 151.7 | 2    | -    | 8  | Y | B  | 3200.6 | 17329.1 | 27.8 |
| 141 | F | 46       | p.H1069Q         | p.L1333P      | Comp. Hetero | ND    | 6.3   | 4    | -    | 7  | Y | H  | 1224.3 | 7866.3  | 40.7 |
| 142 | M | 39       | p.T977M          | p.L1350P      | Comp. Hetero | 22.6  | 32.6  | 5    | -    | 10 | Y | B  | 952.3  | 4400.0  | 22.5 |
| 143 | F | 26       | p.R778L          | p.L770L       | Comp. Hetero | ND    | ND    | <3.0 | -    | 9  | Y | H  | 4554.0 | 3494.9  | 19.0 |
| 144 | M | 61       | p.E1064A         | p.M1359I      | Comp. Hetero | 22.6  | 54.6  | 8    | 1000 | 7  | Y | N  | 3662.3 | 6525.7  | 50.0 |
| 145 | M | 14       | p.E1064K         | p.M665I       | Comp. Hetero | 38.0  | 80.1  | <10  | -    | 8  | Y | H  | 1807.1 | 18697.1 | 25.9 |
| 146 | M | 37       | p.H1069Q         | p.M769H-fs    | Comp. Hetero | ND    | 18.3  | 2    | -    | 9  | Y | B* | 1071.1 | 1478.9  | 24.2 |
| 147 | F | 31       | p.M665I          | p.M769H-fs    | Comp. Hetero | 24.2  | 33.1  | <10  | 736  | 8  | N | H  | 2147.1 | 9625.1  | 31.8 |
| 148 | M | 20       | p.R778L          | p.M769H-fs*26 | Comp. Hetero | ND    | ND    | <3.0 | -    | 8  | N | H  | 4772.0 | 8637.7  | 25.0 |
| 149 | F | 17       | p.H1069Q         | p.M996T       | Comp. Hetero | 130.2 | 180.1 | -    | 2047 | 8  | N | H  | 3827.4 | 8390.3  | 18.6 |
| 150 | F | 31       | p.N415 /p.I1021V | p.M996T       | Comp. Hetero | 129.1 | 218.6 | 4    | >250 | 6  | N | H  | 2365.7 | 12683.4 | 36.1 |
| 151 | F | 23       | p.R778L          | p.N1270S      | Comp. Hetero | 31.0  | 37.0  | <3.0 | -    | 9  | Y | N  | 2282.6 | 911.4   | 9.1  |
| 152 | M | 19       | p.H1069Q         | p.G710S       | Comp. Hetero | 47.5  | 71.1  | 14   | 1302 | 7  | N | H  | 1914.6 | 8516.6  | 25.3 |
| 153 | F | 37       | p.H1069Q         | p.P1273L      | Comp. Hetero | 105.3 | 188.5 | 8    | -    | 10 | Y | N  | 2988.6 | 9387.4  | 22.1 |
| 154 | F | 18       | p.M769H-fs       | p.P1273L      | Comp. Hetero | 121.4 | 170.4 | 5    | -    | 10 | Y | N  | 2105.1 | 14229.7 | 14.7 |
| 155 | F | 21       | p.R816S          | p.P539L       | Comp. Hetero | ND    | ND    | 4.9  | 1028 | 8  | N | H  | 1361.1 | 7390.9  | 36.7 |
| 156 | M | 6        | p.H1069Q         | p.Q1372X      | Comp. Hetero | ND    | 8.3   | <10  | 1191 | 8  | N | H  | 3006.9 | 14422.9 | 39.7 |
| 157 | F | 8        | p.O765Y          | p.R1041W      | Comp. Hetero | 6.8   | 20.7  | 10   | 1211 | 8  | N | H  | 2009.1 | 10128.0 | 49.3 |
| 158 | M | 26       | p.G710S          | p.R115X       | Comp. Hetero | 61.6  | 106.0 | 16   | -    | 10 | Y | H  | 2221.4 | 6214.9  | 35.0 |
| 159 | M | 40       | p.R827W          | p.R120T       | Comp. Hetero | 58.7  | 93.4  | 13   | -    | 7  | N | H  | 3302.3 | 9913.7  | 28.3 |
| 160 | M | 10       | p.H1069Q         | p.R616Q       | Comp. Hetero | 54.9  | 88.0  | 18   | -    | 5  | N | H  | 4659.4 | 14603.4 | 72.2 |
| 161 | M | NA       | p.H1069Q         | p.R778G       | Comp. Hetero | ND    | 8.8   | 11   | -    | 8  | N | A  | 5078.0 | 9179.4  | 52.1 |
| 162 | F | 18       | p.H1069Q         | p.R778G       | Comp. Hetero | ND    | 11.1  | 14   | -    | 5  | N | H  | 2722.0 | 6597.7  | 24.5 |
| 163 | M | 2 months | p.V1106I         | p.R778L       | Comp. Hetero | 4.0   | 9.7   | 10   | -    | -  | N | A  | 4292.9 | 0.0     | 25.1 |
| 164 | F | NA       | p.H1069Q         | p.R778P       | Comp. Hetero | ND    | ND    | 11   | 1332 | 9  | N | H  | 3996.0 | 9588.6  | 35.4 |
| 165 | M | 15       | p.K35N-fs*6      | p.R778W       | Comp. Hetero | 21.8  | 25.1  | <3   | -    | 4  | Y | N  | 1462.9 | 9373.7  | 32.9 |
| 166 | F | 26       | p.M769H-fs       | p.R919L       | Comp. Hetero | ND    | ND    | 13   | 359  | 9  | N | H  | 4341.1 | 10913.7 | 35.4 |
| 167 | F | 19       | p.H1069Q         | p.R919L       | Comp. Hetero | 3.6   | 22.1  | 9    | -    | 10 | Y | N  | 4472.6 | 4241.1  | 29.9 |
| 168 | M | 9        | p.O765Y          | p.R919W       | Comp. Hetero | 26.7  | 46.2  | 8    | -    | 6  | N | H  | 3138.6 | 16010.3 | 24.9 |
| 169 | M | 50       | p.V845S-fs*28    | p.R919W       | Comp. Hetero | ND    | ND    | <4   | -    | 4  | N | H  | 2377.7 | 11437.7 | 24.9 |
| 170 | M | NA       | p.H1069Q         | p.R969Q       | Comp. Hetero | 90.5  | 131.4 | -    | -    | 4  | - | -  | 3761.1 | 26995.4 | 57.2 |
| 171 | F | 9        | p.H1069Q         | p.R969Q       | Comp. Hetero | 145.6 | 220.9 | 16   | -    | 5  | N | H  | 4605.1 | 29201.1 | 65.0 |
| 172 | F | 14       | p.H1069Q         | p.R969Q       | Comp. Hetero | 71.3  | 105.6 | 21   | 1000 | 6  | N | H  | 2403.1 | 12822.9 | 21.4 |
| 173 | F | 23       | p.H1069Q         | p.R969Q       | Comp. Hetero | 35.6  | 29.1  | 17   | -    | 7  | N | H  | 1958.9 | 11641.1 | 46.1 |
| 174 | F | 39       | p.I582R-fs*25    | p.R969Q       | Comp. Hetero | 56.5  | 77.4  | 14   | -    | 3  | N | B  | 1978.6 | 6955.4  | 37.6 |
| 175 | F | 35       | p.I582R-fs*25    | p.R969Q       | Comp. Hetero | 70.4  | 93.6  | 12   | -    | 4  | N | H  | 3733.7 | 5796.6  | 44.0 |
| 176 | M | NA       | p.R616W          | p.R969Q       | Comp. Hetero | 134.2 | 134.2 | 25   | -    | 7  | N | H  | 2855.7 | 6608.0  | 28.8 |
| 177 | M | 20       | p.R919G          | p.T1029I      | Comp. Hetero | 6.7   | 7.2   | 4.8  | -    | 5  | N | H  | 2359.7 | 8910.9  | 43.0 |
| 178 | M | 30       | p.R778L          | p.T1029I      | Comp. Hetero | ND    | ND    | <3.0 | -    | 8  | Y | H  | 3803.7 | 5637.7  | 22.3 |
| 179 | F | 32       | p.R778L          | p.T1031A      | Comp. Hetero | 16.2  | 19.1  | <3.0 | -    | 11 | Y | N  | 2501.7 | 3453.7  | 12.4 |
| 180 | M | 20       | p.H1069Q         | p.T1220M      | Comp. Hetero | ND    | 21.4  | 15.0 | -    | 7  | N | H* | 1786.0 | 10965.1 | 23.8 |
| 181 | F | 41       | p.G1266R         | p.T807I       | Comp. Hetero | 8.3   | 5.9   | 6.0  | 291  | 9  | N | H  | 1786.0 | 11107.4 | 37.8 |
| 182 | M | 40       | p.G515S          | p.T850I       | Comp. Hetero | 11.6  | 13.4  | 10   | -    | 6  | Y | B  | 3111.1 | 8813.7  | 11.5 |
| 183 | F | 31       | p.T977M          | p.T991A       | Comp. Hetero | 137.9 | 191.7 | 12   | -    | 3  | Y | H  | 2552.0 | 11189.7 | 21.5 |
| 184 | M | 10       | p.A874V          | p.V1106I      | Comp. Hetero | 20.1  | 15.5  | 4    | -    | -  | - | -  | 3481.1 | 12035.7 | 25.7 |
| 185 | M | 47       | p.N1270S         | p.V1216M      | Comp. Hetero | 60.3  | 74.2  | <3.0 | -    | 8  | Y | N  | 3250.6 | 7428.6  | 26.2 |
| 186 | M | NA       | p.S932L          | p.V1364V-fs   | Comp. Hetero | ND    | ND    | 10   | -    | 9  | N | B  | 3694.6 | 10523.4 | 49.0 |
| 187 | M | 25       | p.M665I          | p.V845S-fs    | Comp. Hetero | 79.7  | 98.0  | 8    | -    | 6  | - | -  | 1072.3 | 11641.1 | 46.1 |
| 188 | F | 8        | p.M645R          | p.V997-fs     | Comp. Hetero | 38.7  | 72.4  | 2.4  | >250 | 8  | N | H* | 1629.7 | 9001.1  | 25.9 |
| 189 | M | 24       | p.R1041W         | p.V1353*      | Comp. Hetero | ND    | ND    | 10   | -    | 5  | Y | H  | 1906.9 | 10686.9 | 29.3 |
| 190 | M | 15       | p.H1069Q         | p.W779G       | Comp. Hetero | 4.1   | 7.7   | 6.3  | -    | 6  | N | H  | 936.0  | 6580.6  | 23.2 |
| 191 | M | 8        | p.H1069Q         | p.W779X       | Comp. Hetero | ND    | 10.7  | 18   | 763  | 9  | Y | H  | 3024.9 | 4560.0  | 31.8 |
| 192 | M | 22       | p.H1069Q         | p.W939C       | Comp. Hetero | ND    | 12.2  | 3    | -    | 6  | N | H  | 2688.0 | 14091.4 | 27.6 |
| 193 | F | 15       | p.S136S-fs*12    | p.W743I-fs*19 | Comp. Hetero | ND    | ND    | <6   | -    | 7  | N | H  | 2700.3 | 8075.4  | 48.5 |
| 194 | M | 50       | p.O765Y          | unknown       | unknown      | 20.4  | 21.4  | <4   | -    | 8  | Y | N  | 2898.0 | 5292.6  | 29.6 |
| 195 | F | 43       | p.C5143A4        | unknown       | unknown      | 25.6  | 37.6  | 4    | -    | 8  | Y | N  | 1971.4 | 3164.6  | 22.6 |
| 196 | F | 28       | p.A1049A-fs      | unknown       | unknown      | 2.2   | 9.1   | 3    | -    | 7  | Y | N  | 1824.0 | 4130.3  | 45.0 |
| 197 | M | 22       | p.G1176R         | unknown       | unknown      | 3.6   | 7.3   | 3    | -    | 5  | N | H  | 1991.4 | 18424.0 | 43.0 |
| 198 | F | NA       | p.H1069Q         | unknown       | unknown      | ND    | 5.0   | 12   | -    | 6  | N | H  | 4220.3 | 17555.4 | 46.7 |
| 199 | M | 17       | p.H1069Q         | unknown       | unknown      | 8.6   | 32.9  | <10  | -    | 5  | N | N  | 1628.3 | 5894.9  | 43.8 |
| 200 | M | 14       | p.H1069Q         | unknown       | unknown      | ND    | 6.7   | 13   | -    | 4  | Y | H  | 1919.4 | 9124.6  | 32.0 |
| 201 | M | 14       | p.H1069Q         | unknown       | unknown      | 31.4  | 23.0  | 3.4  | -    | 4  | N | H  | 1962.9 | 14021.7 | 18.2 |
| 202 | F | 16       | p.M769H-fs       | unknown       | unknown      | ND    | ND    | 13.8 | 525  | 6  | Y | H  | 1401.1 | 6582.9  | 17.4 |
| 203 | M | 37       | p.R1319X         | unknown       | unknown      | 3.0   | 5.2   | <10  | 1042 | 9  | Y | B  | 4165.1 | 32413.7 | 42.7 |
| 204 | M | 12       | p.R778L          | unknown       | unknown      | ND    | 9.5   | <3.0 | -    | 5  | N | H  | 4073.1 | 8524.6  | 28.9 |
| 205 | M | 25       | p.T1220M         | unknown       | unknown      | 67.7  | 77.0  | <10  | 191  | 4  | N | B  | 3612.9 | 6674.3  | 27.7 |
| 206 | M | 45       | p.W779X          | unknown       | unknown      | ND    | ND    | <4   | -    | 6  | Y | H  | 1196.9 | 6755.4  | 18.7 |
| 207 | F | 18       | p.W779X          | unknown       | unknown      | 38.0  | 65.6  | 15.3 | 258  | 6  | N | H  | 1515.1 | 8123.4  | 31.5 |
| 208 | M | 17       | c.22994eC        | unknown       | unknown      | ND    | ND    | <2   | -    | 4  | N | H  | 1332.3 | 9917.7  | 25.2 |
| 209 | M | 19       | c.22994eC        | unknown       | unknown      | ND    | ND    | <2   | 502  | 8  | N | N  | 1078.3 | 4489.1  | 19.4 |
| 210 | M | NA       | p.L1305P         | unknown       | unknown      | ND    | 6.0   | -    | -    | 3  | - | -  | 1612.3 | 12888.0 | 45.4 |
| 211 | F | 22       | p.H1069Q         | unknown       | unknown      | ND    | 7.9   | 2    | -    | 5  | N | N  | 3527.1 | 8246.9  | 30.0 |
| 212 | M | 49       | NA               | NA            | NA           | 3.0   | 4.0   | <3.0 | -    | 4  | Y | H  | 4231.7 | 7104.0  | 28.6 |
| 213 | M | NA       | NA               | NA            | NA           | ND    | ND    | 12   | 388  | 10 | N | H* | 4666.9 | 12170.3 | 17.5 |
| 214 | F | NA       | NA               | NA            | NA           | ND    | ND    | 14   | -    | 8  | N | H* | 3359.4 | 6130.3  | 17.9 |
| 215 | M | NA       | NA               | NA            | NA           | ND    | ND    | 3    | -    | 5  | N | B  | 2492.0 | 3841.0  | 16.8 |
| 216 | F | NA       | NA               | NA            | NA           | 31.2  | 44.8  | 2.0  | -    | 3  | N | A  | 4401.1 | 22524.6 |      |
