# Supplementary material
Source: PubMed Central journal article supplement (PMC8243898)

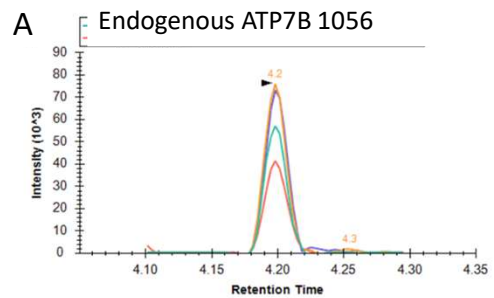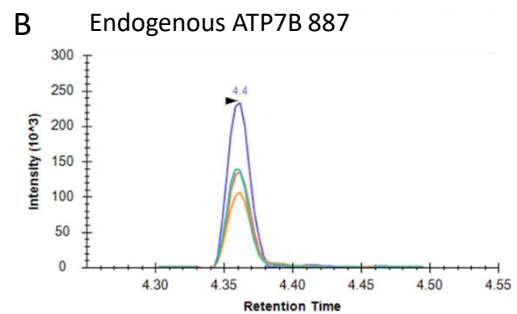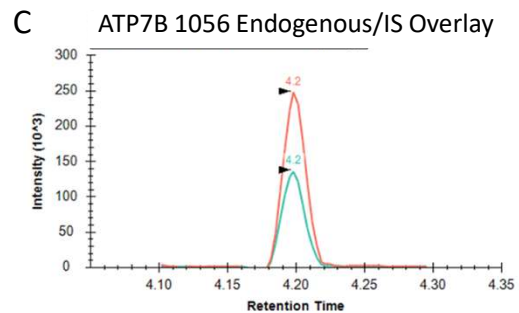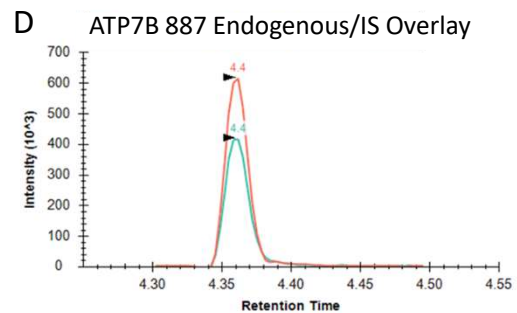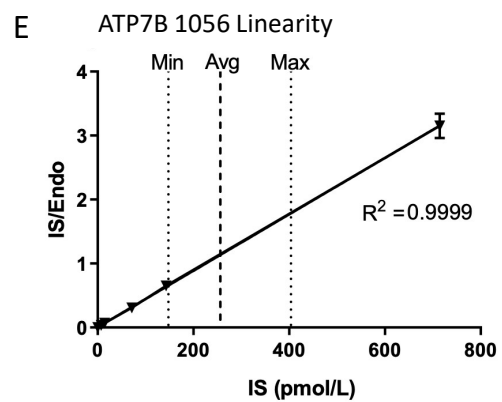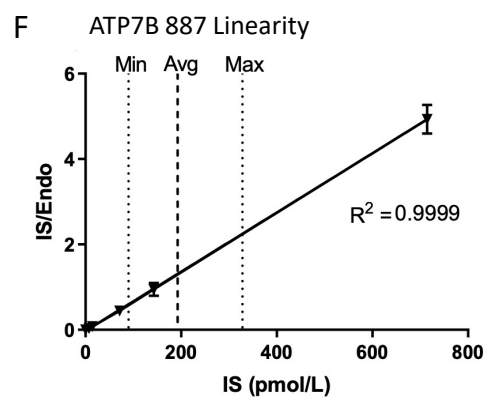

Supplement: NIHMS1680167-supplement-SF1.pdf [file NIHMS1680167-supplement-SF1.pdf]
